# Supplementary material
Source: PubMed Central journal article supplement (PMC4987192)

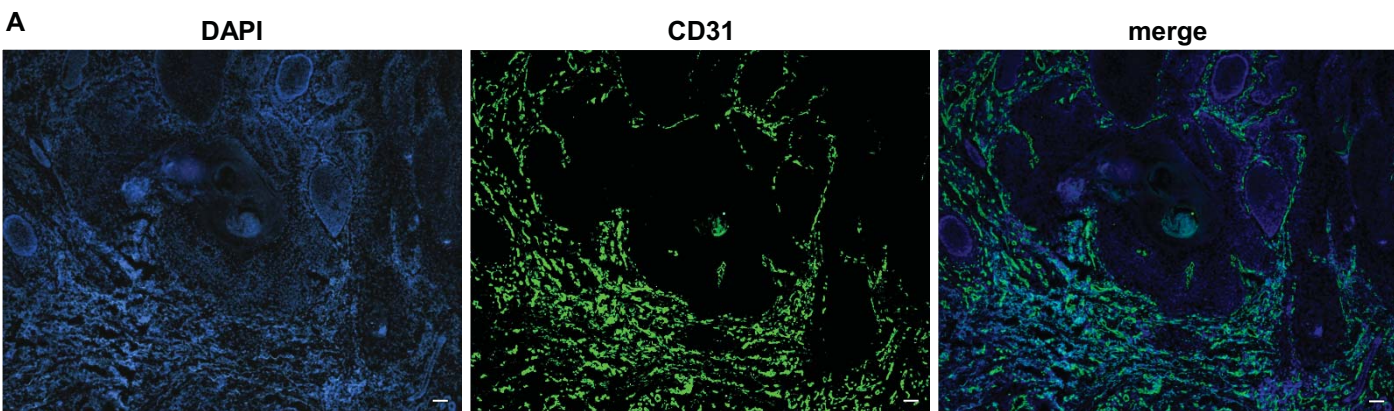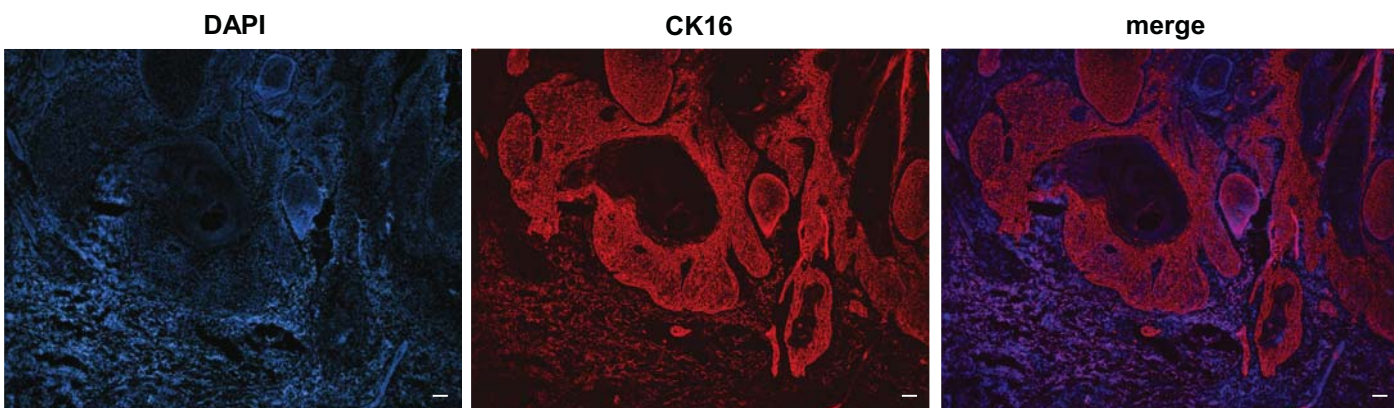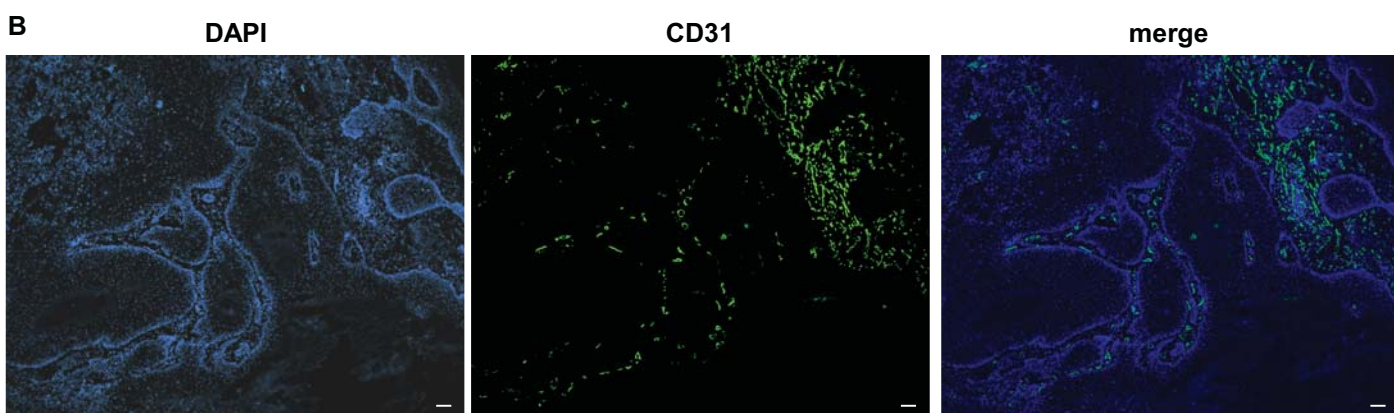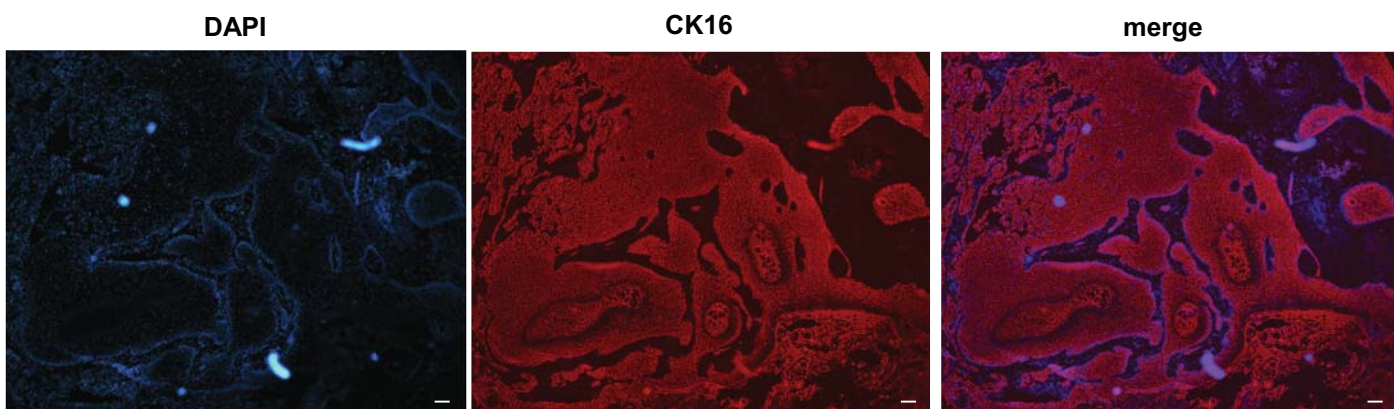

Supplement: NIHMS775798-supplement-3.pdf [file NIHMS775798-supplement-3.pdf]

DAPI

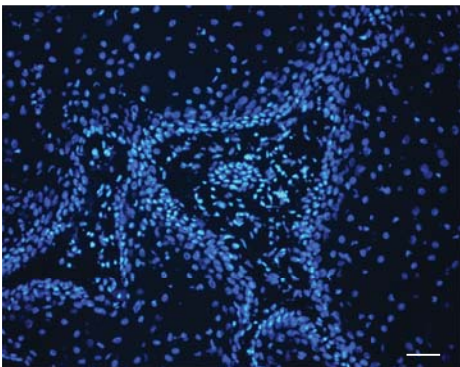

CK16

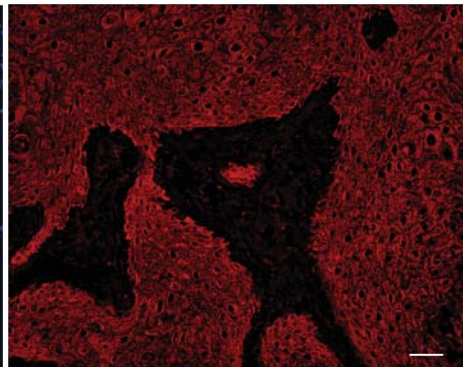

merge

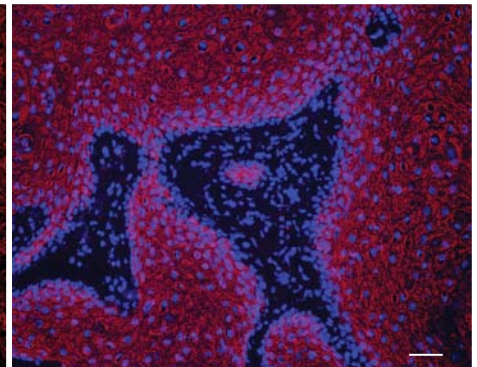

DAPI

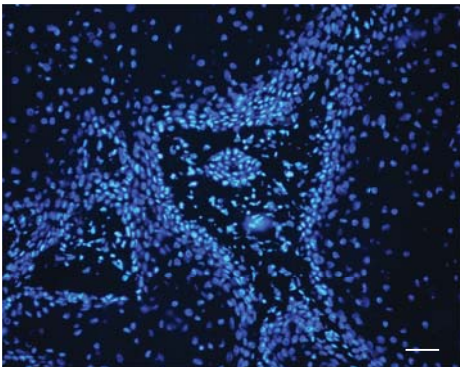

CD31

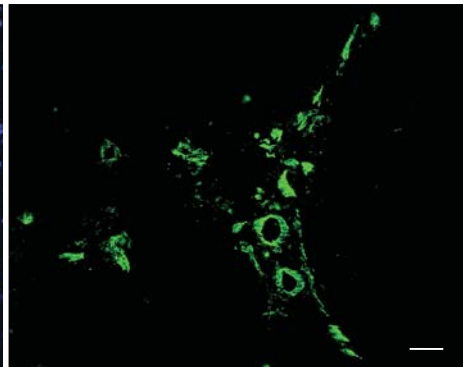

merge

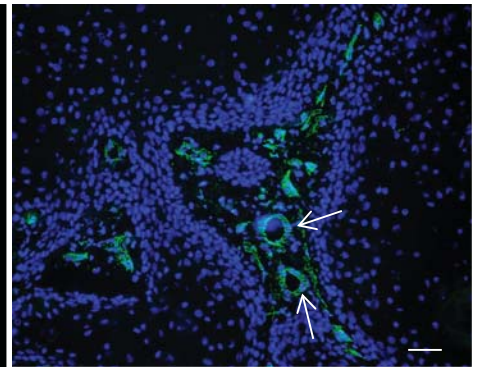

DAPI

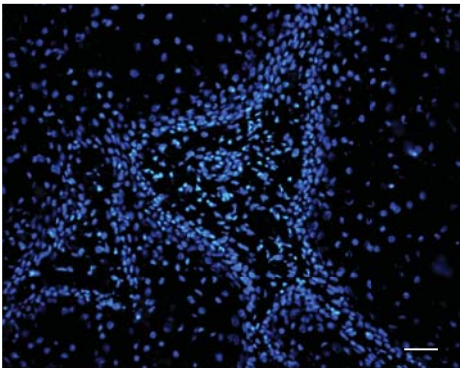

e-selectin

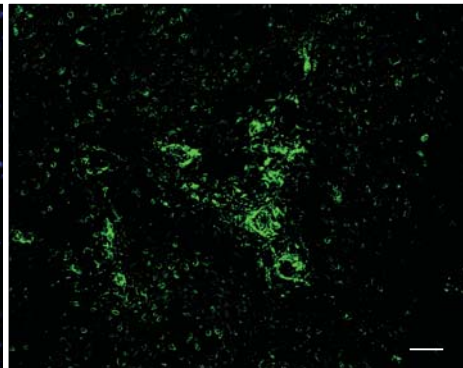

merge

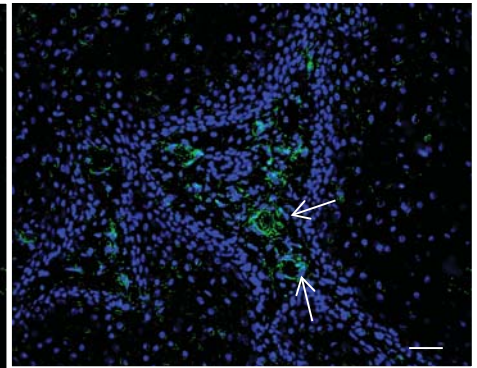

Supplement: NIHMS775798-supplement-4.pdf [file NIHMS775798-supplement-4.pdf]
